CORRECTION

# Correction: Investigation of the Differential Contributions of Superficial and Deep Muscles on Cervical Spinal Loads with Changing Head Postures

The *PLOS ONE* Staff

The first author is incorrectly designated as the Corresponding Author. The correct Corresponding Author is Hsin-Yi Kathy Cheng. The correct e-mail address is: [kcheng@mail.cgu.edu.tw](mailto:kcheng@mail.cgu.edu.tw).

## Reference

1. Cheng C-H, Chien A, Hsu W-L, Chen CP-C, Cheng H-YK (2016) Investigation of the Differential Contributions of Superficial and Deep Muscles on Cervical Spinal Loads with Changing Head Postures. *PLoS ONE* 11(3): e0150608. doi:[10.1371/journal.pone.0150608](https://doi.org/10.1371/journal.pone.0150608) PMID: [26938773](https://pubmed.ncbi.nlm.nih.gov/26938773/)

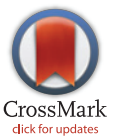

## OPEN ACCESS

**Citation:** The *PLOS ONE* Staff (2016) Correction: Investigation of the Differential Contributions of Superficial and Deep Muscles on Cervical Spinal Loads with Changing Head Postures. *PLoS ONE* 11(4): e0153541. doi:[10.1371/journal.pone.0153541](https://doi.org/10.1371/journal.pone.0153541)

**Published:** April 8, 2016

**Copyright:** © 2016 The PLOS ONE Staff. This is an open access article distributed under the terms of the [Creative Commons Attribution License](https://creativecommons.org/licenses/by/4.0/), which permits unrestricted use, distribution, and reproduction in any medium, provided the original author and source are credited.
